# Supplementary material for: New dry carbon nanotube coating of over-lithiated layered oxide cathode for lithium ion batteries
Source: Royal Society of Chemistry journal article supplement (doi:10.1039/c4ta04818k), 2014-01-01
Supplement: c4ta04818k1.pdf [file c4ta04818k1.pdf]

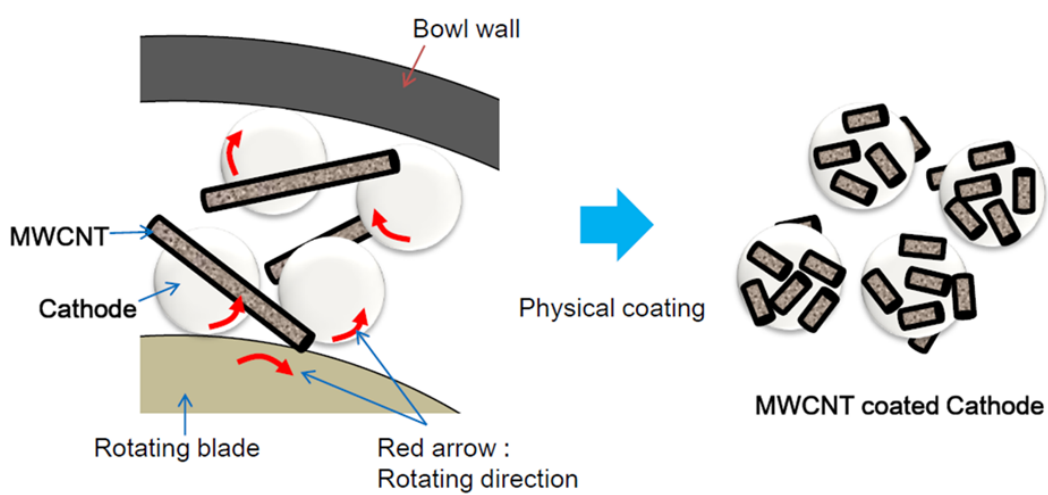

**Fig. S1 Schematic illustration of physical coating process**

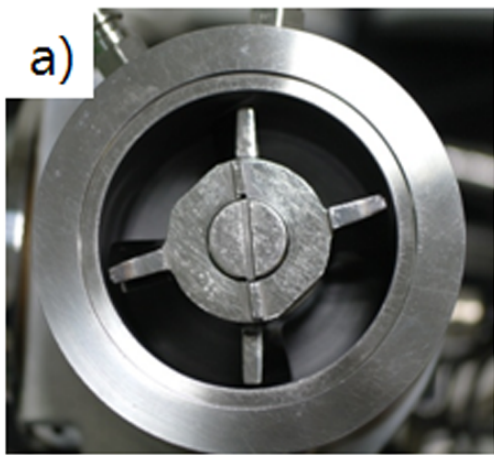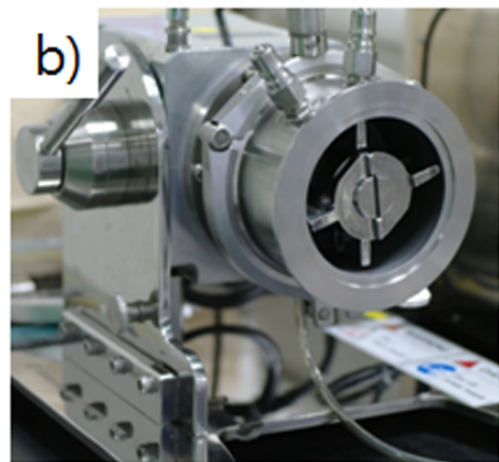

Fig. S2 photos of Nobilta mini, a) the bowl with a top view and b) the bowl positioned perpendicularly for being parallel to the ground.

| Atomic Concentration / % |       |      |      |       |       |       |
|--------------------------|-------|------|------|-------|-------|-------|
| Coating time             | Li 1s | C 1s | O 1s | Mn 2p | Co 2p | Ni 2p |
| 0 min                    | 13.6  | 14.8 | 45.7 | 14.8  | 2.7   | 8.5   |
| 3 min                    | 7.6   | 55.2 | 27.0 | 6.6   | 1.3   | 2.1   |
| 20 min                   | 3.8   | 75.2 | 17.5 | 2.6   | 0.4   | 0.5   |

**Table S1 Atomic concentration of each element obtained from the pristine and 2 wt.% MWCNT-coated samples after 3 and 20 coating time.**

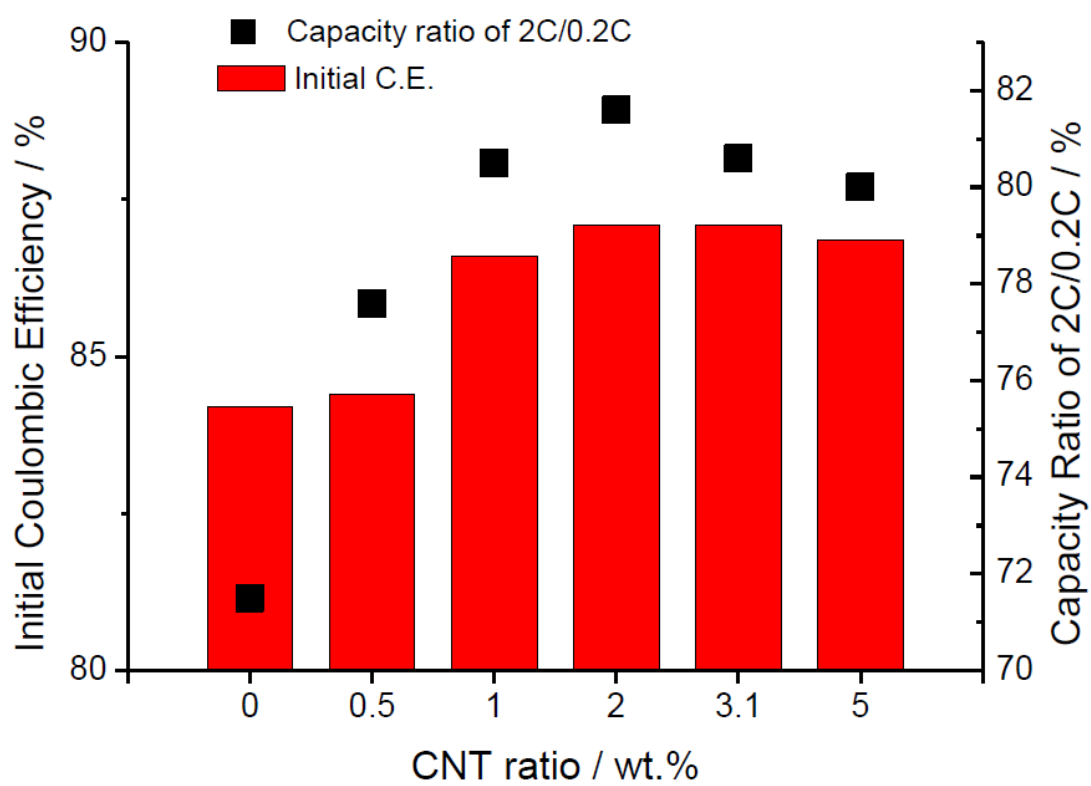

Fig. S3 Initial coulombic efficiencies (red bar) and rate capability (black square, specific capacity ratio of 2 C/0.2 C) obtained from the prepared samples (non-coated and coated with varying amounts of MWCNT).
